# Supplementary material
Source: PubMed Central journal article supplement (PMC5743017)
Supplement: NIHMS902999-supplement-Supplement.pdf [file NIHMS902999-supplement-Supplement.pdf]

**A Rapid Phenotypic Whole Cell Screening Approach for the Identification of Small Molecule Inhibitors that Counter Beta-lactamase Resistance in *Pseudomonas aeruginosa***

**Deanna Colli<sup>1</sup>, Thomas D. Bannister<sup>2</sup>, Hao Tan<sup>3</sup>, Shouguang Jin<sup>3<sup>a</sup></sup>, Taimour Langae<sup>4</sup>, Justin Shumate<sup>1</sup>, Louis Scampavia<sup>1</sup>, Timothy P. Spicer<sup>1\*</sup>**

Affiliations:

<sup>1</sup>The Scripps Research Institute Molecular Screening Center, Department of Molecular Medicine and <sup>2</sup>Department of Chemistry, Scripps Florida, Jupiter, FL; <sup>3</sup>Department of Molecular Genetics and Microbiology, College of Medicine and <sup>4</sup>Department of Pharmacotherapy and Translational Research, Center for Pharmacogenomics, College of Pharmacy, University of Florida, Gainesville, FL

**Short title:**

HTS Identification of AmpG Specific Small Molecule Inhibitors in *Pseudomonas aeruginosa*

Key words: Pseudomonas, AmpG, Gram negative bacteria

**α** Co-communicated with SJ

\*Address correspondence to:

*Timothy Spicer*

*Scripps Florida*

*130 Scripps Way #1A1*

*Jupiter, FL 33458*

*U.S.A.*

*Email: [spicert@scripps.edu](mailto:spicert@scripps.edu)*

*561-228-2150*

**Supplemental Section:**

| <u>Antibiotic</u> | <u>Expected MIC</u><br><u>(ug/mL)</u> | <u>Scripps MIC</u><br><u>(ug/mL)</u> | <u>S:B</u> | <u>Z'</u> |
|-------------------|---------------------------------------|--------------------------------------|------------|-----------|
| Ciprofloxacin     | 2                                     | 3                                    | 3.04       | 0.89      |
| Erythromycin      | 64                                    | 100                                  | 2.92       | 0.9       |
| Aztreonam         | 2                                     | 1.6                                  | 2.96       | 0.82      |

**Supplemental Table 1.** Susceptibility of PAO1 to well-studied antibiotics. PAO1 was cultured in the presence of varying concentrations of antibiotics and MIC values were compared to established values.

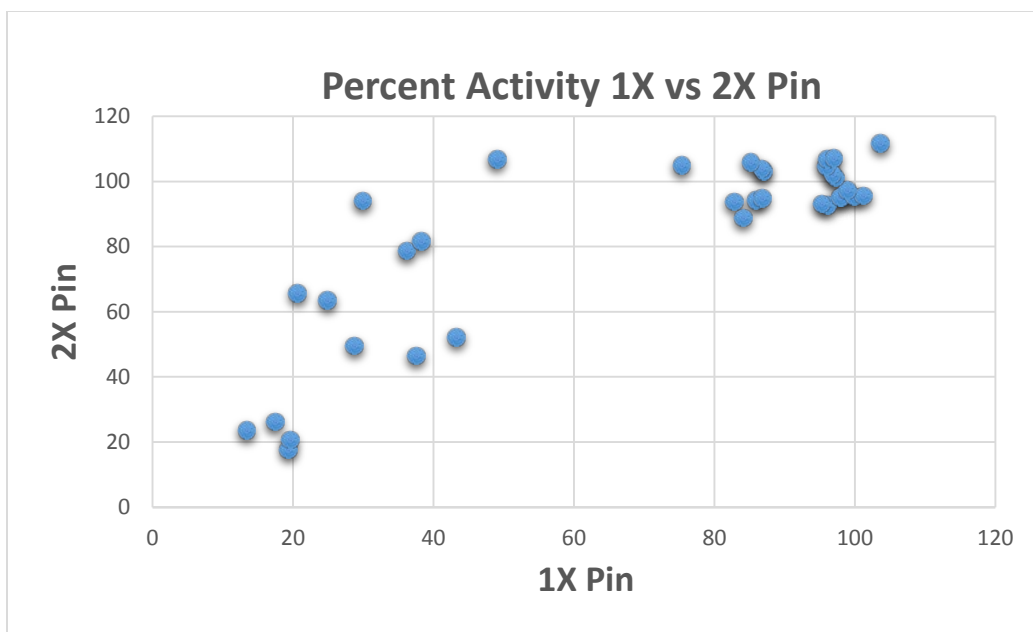

|                                        |                         |
|----------------------------------------|-------------------------|
| <b>Pearson r</b>                       | <b>0.8281</b>           |
| <b>95% confidence interval</b>         | <b>0.6804 to 0.9111</b> |
| <b>P value (two-tailed)</b>            | <b>&lt; 0.0001</b>      |
| <b>P value summary</b>                 | <b>***</b>              |
| <b>Is the correlation significant?</b> | <b>Yes</b>              |
| <b>R squared</b>                       | <b>0.6857</b>           |

**Supplemental Figure 1.** PAO1 AmpG assay correlation plot – 1X vs 2X pinning. The relative activities of compounds for 17 matched plates were compared at single versus double pinning (10uM versus 20uM screening concentration).

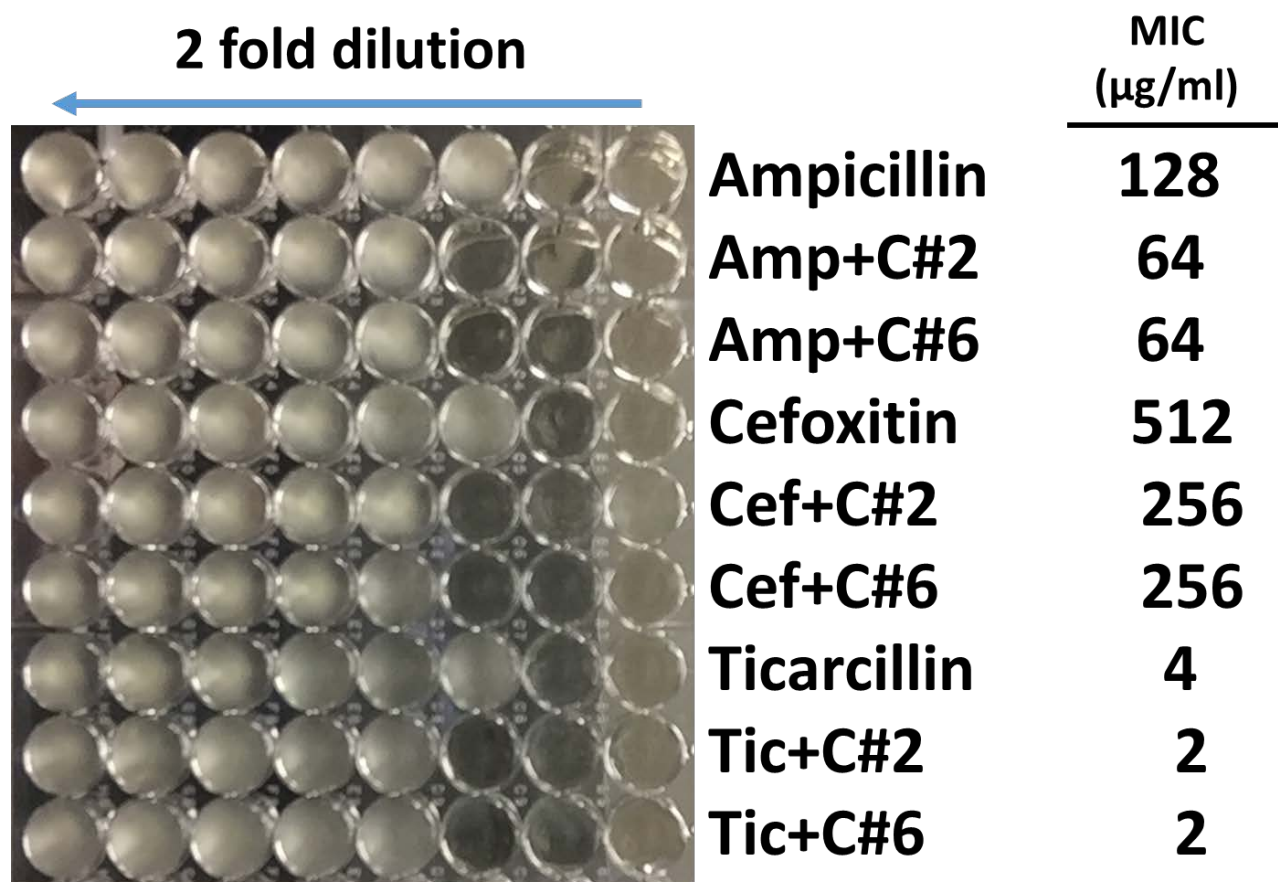

**Supplemental Figure 2.** Synergy testing in PAO1 bacteria. 25µg/mL of test compound were tested in combination with or without antibiotics known to induce AmpC. This was the highest concentration of compound that was not found to be toxic to the bacteria by itself. In this case the antibiotics were serially diluted and added to a constant concentration of test compound, i.e. either compound #2 or #6 (C#2 or C#6) as listed in Table 3 of the main text. The MIC of each antibiotic by itself or in combination is shown. The presence of turbidity indicates bacterial growth which as shown when in combination yields a 2 fold improvement in the efficacy of the Amp=Ampicillin, Cef=Cefoxitin, Tic=Ticarcillin. This experiment was repeated and confirmed the results shown above for an N of 2 experiments.

| SampleID         | Compound Information |                                | Compound Descriptors |                  |               |                  |                  |       |        | PAINS_A | PAINS_B | PAINS_C              | Dose Response Curve | PAO1 PamC LUX LUMI |                         |                       |            |                   |      | PAO1 LUX ABS |            |                         | PAO1 ABS              |            |                         | No Fox ABS            |            |            |                         |                       |           |       |       |
|------------------|----------------------|--------------------------------|----------------------|------------------|---------------|------------------|------------------|-------|--------|---------|---------|----------------------|---------------------|--------------------|-------------------------|-----------------------|------------|-------------------|------|--------------|------------|-------------------------|-----------------------|------------|-------------------------|-----------------------|------------|------------|-------------------------|-----------------------|-----------|-------|-------|
|                  | Structure            | Vendor Name                    | Vendor Catalog       | Heavy Atom Count | H bond donors | H bond acceptors | Molecular Weight | logP  | logD   |         |         |                      |                     | Final EC50         | Averaged Max % Response | StdDev Max % Response | Hill Slope | Ligand Efficiency | logP | logD         | Final EC50 | Averaged Max % Response | StdDev Max % Response | Final EC50 | Averaged Max % Response | StdDev Max % Response | Hill Slope | Final EC50 | Averaged Max % Response | StdDev Max % Response |           |       |       |
| SR-010002786-1   |                      | ChemBridge                     | 7826815              | 32               | 2             | 6                | 434.48           | 3.53  | 3.52   |         |         |                      |                     | = 2.4E-9           | 52.27                   | 35.41                 | 1.58       | 0.38              | #### | 5.10         | >          | 45.7E-6                 | -2.9E+0               | 1.53       | >                       | 45.7E-6               | 2.40       | 3.83       | >                       | 45.7E-6               | -223.7E-3 | 4.17  |       |
| SR-010007620-2   |                      | SigmaAldrich                   | R-2751               | 25               | 14            | 16               | 786.35           | 0.54  | 0.54   |         |         |                      |                     | = 3.1E-6           | 96.71                   | 0.32                  | 2.92       | 0.31              | #### | 4.96         | =          | 27.3E-6                 | 107.70                | 4.33       | =                       | 41.1E-6               | 89.78      | 9.90       | 18.29                   | =                     | 42.2E-6   | 90.39 | 8.44  |
| SR-050000238-3   |                      | BIOMOL                         | NP-223               | 11               | 1             | 4                | 154.12           | ##### | -0.38  |         |         |                      |                     | = 6.5E-6           | 91.48                   | 1.57                  | 0.78       | 0.66              | #### | 5.57         | >          | 45.7E-6                 | 22.66                 | 10.69      | =                       | 34.8E-6               | 80.67      | 12.84      | 5.86                    | =                     | 36.6E-6   | 67.93 | 13.14 |
| SR-01001020782-1 |                      | Asinex                         | BAS 00244885         | 19               | 2             | 4                | 255.27           | 2.34  | 2.33   |         |         | hizone_chemid_A(479) |                     | = 10.4E-6          | 85.46                   | 5.21                  | 3.84       | 0.37              | #### | 2.65         | >          | 45.7E-6                 | 14.35                 | 3.00       | >                       | 45.7E-6               | 26.55      | 3.04       | >                       | 45.7E-6               | 21.34     | 6.29  |       |
| SR-01000827276-1 |                      | Sequoia Research Products Ltd. | SRP00850b            | 28               | 2             | 7                | 389.42           | ##### | -0.43  |         |         |                      |                     | >                  | 11.4E-6                 | 9.79                  | 16.34      | 0.25              | #### | 5.37         | =          | 11.4E-6                 | 50.41                 | 3.70       | =                       | 6.8E-6                | 58.30      | 6.97       | 5.56                    | =                     | 7.1E-6    | 54.40 | 6.57  |
| SR-050000070-1   |                      | MicroSource                    | 01500492             | 85               | 18            | 18               | 1203.48          | ##### | -17.72 |         |         |                      |                     | = 14.E-6           | 97.11                   | 0.98                  | 2.23       | 0.08              | #### | 22.57        | =          | 27.2E-6                 | 107.51                | 6.96       | >                       | 15.2E-6               | #####      | 0.85       | >                       | 15.2E-6               | 103.63    | 1.47  |       |
| SR-01000597499-6 |                      | Cayman Chemical                | 70610                | 20               | 3             | 5                | 270.24           | 2.71  | 1.95   |         |         | catechol_A(92)       |                     | >                  | 18.3E-6                 | 25.47                 | 10.62      | 0.33              | #### | 2.79         | >          | 18.3E-6                 | 12.16                 | 2.70       | >                       | 18.3E-6               | 15.74      | 4.37       | >                       | 18.3E-6               | 15.23     | 4.67  |       |
| SR-01000000495-5 |                      | Cayman Chemical                | 81025                | 27               | 2             | 6                | 368.38           | 4.12  | 4.12   |         |         |                      |                     | >                  | 18.3E-6                 | 20.44                 | 7.73       | 0.25              | #### | 0.62         | >          | 18.3E-6                 | 9.23                  | 3.27       | >                       | 18.3E-6               | 29.08      | 2.68       | >                       | 18.3E-6               | 26.99     | 1.71  |       |
| SR-01000946328-1 |                      | Cayman Chemical                | 10009986             | 29               | 0             | 6                | 396.43           | 4.42  | 4.41   |         |         |                      |                     | >                  | 18.3E-6                 | 37.19                 | 47.61      | 0.23              | #### | 0.32         | >          | 18.3E-6                 | 9.46                  | 2.41       | >                       | 18.3E-6               | 30.06      | 4.36       | >                       | 18.3E-6               | 27.01     | 2.66  |       |
| SR-01000588239-1 |                      | Deltagen                       | K839-0038            | 28               | 2             | 5                | 378.42           | 3.61  | 3.58   |         |         | manmich_A(246)       |                     | = 21.2E-6          | 76.83                   | 1.47                  | 6.96       | 0.23              | #### | 1.09         | =          | 11.6E-6                 | 75.58                 | 4.55       | =                       | 22.1E-6               | 61.66      | 3.88       | 1.35                    | =                     | 16.9E-6   | 58.01 | 3.59  |
| SR-01000612324-5 |                      | BIOMOL                         | DL-498               | 25               | 1             | 7                | 363.41           | 0.83  | -0.18  |         |         |                      |                     | >                  | 25.1E-6                 | 20.91                 | 7.86       | 0.26              | #### | 4.78         | >          | 25.1E-6                 | 22.48                 | 2.38       | =                       | 11.2E-6               | #####      | 0.57       | 8.65                    | =                     | 13.7E-6   | 94.51 | 5.86  |
| SR-01000949932-1 |                      | Deltagen                       | 4545-1561            | 32               | 1             | 6                | 468.81           | 5.22  | 5.17   |         |         | ene_fwe_het_A(21)    |                     | >                  | 29.3E-6                 | -9.5E+0               | 1.45       | 0.20              | #### | #####        | >          | 29.3E-6                 | -1.3E+0               | 2.25       | >                       | 29.3E-6               | 5.49       | 6.84       | >                       | 29.3E-6               | 3.59      | 6.98  |       |
| SR-01000455070-1 |                      | Deltagen                       | 3486-0184            | 24               | 2             | 5                | 326.35           | 3.10  | 3.07   |         |         |                      |                     | >                  | 34.5E-6                 | 12.02                 | 9.41       | 0.26              | #### | 1.39         | >          | 34.5E-6                 | 14.34                 | 0.67       | >                       | 34.5E-6               | 28.18      | 5.00       | >                       | 34.5E-6               | 27.09     | 2.07  |       |
| SR-01000569902-1 |                      | Deltagen                       | K784-0750            | 26               | 0             | 3                | 371.54           | 4.71  | 4.71   |         |         |                      |                     | >                  | 35.1E-6                 | -3.9E+0               | 3.92       | 0.24              | #### | #####        | >          | 35.1E-6                 | 2.06                  | 0.94       | >                       | 35.1E-6               | 23.68      | 2.42       | >                       | 35.1E-6               | 19.36     | 5.20  |       |
| SR-01000548585-1 |                      | Deltagen                       | C093-0157            | 34               | 1             | 5                | 452.55           | 5.24  | 4.64   |         |         |                      |                     | >                  | 37.9E-6                 | 17.82                 | 12.25      | 0.18              | #### | #####        | >          | 37.9E-6                 | 0.21                  | 3.81       | >                       | 37.9E-6               | 2.87       | 3.30       | >                       | 37.9E-6               | -1.1E+0   | 3.19  |       |
| SR-01000407137-1 |                      | Deltagen                       | 1773-0188            | 27               | 1             | 3                | 358.43           | 4.65  | 4.65   |         |         |                      |                     | >                  | 40.4E-6                 | -13.9E+0              | 3.52       | 0.23              | #### | #####        | >          | 40.4E-6                 | -1.5E+0               | 0.11       | >                       | 40.4E-6               | 17.21      | 3.23       | >                       | 40.4E-6               | 11.93     | 4.86  |       |
| SR-01000536500-1 |                      | Deltagen                       | 8012-5120            | 28               | 2             | 3                | 392.37           | 4.63  | 4.63   |         |         |                      |                     | >                  | 40.6E-6                 | -11.3E+0              | 11.64      | 0.22              | #### | #####        | >          | 40.6E-6                 | -443.3E-3             | 5.65       | >                       | 40.6E-6               | 19.20      | 2.21       | >                       | 40.6E-6               | 13.44     | 2.81  |       |
| SR-0100021819-1  |                      | Deltagen                       | 8008-9610            | 20               | 1             | 4                | 336.23           | 1.47  | 1.37   |         |         |                      |                     | >                  | 40.9E-6                 | 22.51                 | 10.95      | 0.31              | #### | 3.02         | >          | 40.9E-6                 | 9.61                  | 1.82       | >                       | 40.9E-6               | 17.37      | 2.23       | >                       | 40.9E-6               | 13.70     | 3.46  |       |
| SR-01000520919-1 |                      | Deltagen                       | 8008-7873            | 24               | 1             | 3                | 387.28           | 3.20  | 3.20   |         |         |                      |                     | >                  | 42.2E-6                 | 31.11                 | 21.74      | 0.26              | #### | 1.17         | >          | 42.2E-6                 | 4.21                  | 4.57       | >                       | 42.2E-6               | 18.45      | 1.38       | >                       | 42.2E-6               | 8.50      | 9.41  |       |

| SR-01000139385-1                          | SR-05000002388-2 | SR-01000095587-1 | SR-0100016437-1 | SR-0100027910-1 | SR-0100025678-1 | SR-01000849391-1 | SR-0100037437-1 | SR-01000289591-1 | SR-01000106388-1 | SR-01000246161-1 | SR-0100028278-1 | SR-0100029852-1 | SR-01000274283-1 | SR-0100006670-1 | SR-01000019293-1 | SR-01000296981-1 | SR-0100011590-1 | SR-0100050437-1 |           |         |
|-------------------------------------------|------------------|------------------|-----------------|-----------------|-----------------|------------------|-----------------|------------------|------------------|------------------|-----------------|-----------------|------------------|-----------------|------------------|------------------|-----------------|-----------------|-----------|---------|
|                                           |                  |                  |                 |                 |                 |                  |                 |                  |                  |                  |                 |                 |                  |                 |                  |                  |                 |                 |           |         |
| DeltaGen                                  | ChemDiv          | ChemBridge       | Life Chemicals  | Life Chemicals  | ChemBridge      | ChemBridge       | ChemBridge      | ChemBridge       | ChemDiv          | ChemBridge       | Asinex          | ChemBridge      | ChemBridge       | ChemBridge      | ChemDiv          | ChemDiv          | BIOMOL          | ChemBridge      | ChemDiv   |         |
| 4896-0223                                 | 7706-0023        | 7968218          | F2005-0226      | F0526-1304      | 7775325         | 7943237          | 6991589         | 6662362          | C782-0528        | 6080467          | AEM 07470187    | 7910189         | 6037655          | 7813548         | K906-4384        | C327-0222        | EI-135          | 7800795         | E003-1063 |         |
| 27                                        | 24               | 26               | 26              | 32              | 26              | 24               | 33              | 23               | 28               | 19               | 27              | 28              | 31               | 30              | 29               | 29               | 27              | 28              | 28        |         |
| 2                                         | 1                | 2                | 1               | 2               | 1               | 1                | 0               | 4                | 0                | 2                | 1               | 2               | 2                | 3               | 1                | 2                | 2               | 2               | 1         |         |
| 4                                         | 4                | 4                | 6               | 4               | 3               | 3                | 5               | 5                | 4                | 3                | 5               | 5               | 4                | 4               | 3                | 4                | 6               | 4               | 4         |         |
| 359.40                                    | 319.40           | 345.37           | 364.42          | 447.55          | 412.85          | 347.26           | 438.43          | 316.28           | 401.57           | 285.40           | 380.41          | 399.46          | 411.41           | 425.50          | 411.52           | 417.50           | 368.38          | 404.52          | 385.45    |         |
| 4.46                                      | 1.94             | 3.73             | 2.36            | 4.86            | 3.11            | 3.13             | 3.14            | 3.24             | 4.55             | 3.37             | 3.51            | 3.37            | 3.57             | 4.32            | 3.77             | 3.22             | 4.12            | 3.86            | 3.10      |         |
| 4.37                                      | 1.71             | 3.70             | 2.36            | 4.59            | 3.11            | 3.13             | 3.14            | 3.19             | 4.55             | 3.01             | 3.05            | 3.36            | 3.57             | 4.24            | 3.77             | 3.21             | 4.12            | 3.86            | 3.10      |         |
| mamich_A(296) mamich_A(296) mamich_A(296) |                  |                  |                 |                 |                 |                  |                 |                  |                  |                  |                 |                 |                  |                 |                  |                  |                 |                 |           |         |
|                                           |                  |                  |                 |                 |                 |                  |                 |                  |                  |                  |                 |                 |                  |                 |                  |                  |                 |                 |           |         |
| >                                         | =                | =                | >               | >               | >               | >                | >               | >                | >                | >                | >               | >               | >                | >               | >                | >                | >               | >               | >         |         |
| 42.3E-6                                   | 43.7E-6          | 44.7E-6          | 45.1E-6         | 45.3E-6         | 45.7E-6         | 45.7E-6          | 45.7E-6         | 45.7E-6          | 45.7E-6          | 45.7E-6          | 45.7E-6         | 45.7E-6         | 45.7E-6          | 45.7E-6         | 45.7E-6          | 45.7E-6          | 45.7E-6         | 45.7E-6         | 45.7E-6   |         |
| 3.74                                      | 53.10            | 73.15            | 2.01            | 19.61           | -7.4E+0         | 6.89             | 21.04           | 10.38            | 3.47             | 11.68            | -7.7E+0         | -3.3E+0         | 5.58             | -5.2E+0         | 18.91            | -7.4E+0          | 35.44           | 15.13           | 0.12      |         |
| 17.67                                     | 16.76            | 9.43             | 21.49           | 19.68           | 9.50            | 20.04            | 21.04           | 10.38            | 9.86             | 9.33             | 8.53            | 20.10           | 4.02             | 6.63            | 7.06             | 6.21             | 16.61           | 9.47            | 12.78     |         |
| 0.23                                      | 0.25             | 0.23             | 0.23            | 0.19            | 0.23            | 0.25             | 0.18            | 0.26             | 0.22             | 0.32             | 0.23            | 0.22            | 0.20             | 0.20            | 0.21             | 0.21             | 0.23            | 0.22            | 0.22      |         |
| ###                                       | ###              | ###              | ###             | ###             | ###             | ###              | ###             | ###              | ###              | ###              | ###             | ###             | ###              | ###             | ###              | ###              | ###             | ###             | ###       | ###     |
| 4E-3                                      | 2.65             | 0.65             | 1.99            | ###             | 1.23            | 1.21             | 1.20            | 1.15             | ###              | 1.33             | 1.30            | 0.98            | 0.77             | 0.10            | 0.57             | 1.13             | 0.22            | 0.48            | 1.24      |         |
| catechol_A(02) thiophene_amino C(7)       |                  |                  |                 |                 |                 |                  |                 |                  |                  |                  |                 |                 |                  |                 |                  |                  |                 |                 |           |         |
| >                                         | >                | >                | >               | >               | >               | >                | >               | >                | >                | >                | >               | >               | >                | >               | >                | >                | >               | >               | >         |         |
| 42.3E-6                                   | 45.7E-6          | 45.7E-6          | 45.1E-6         | 45.3E-6         | 45.7E-6         | 45.7E-6          | 45.7E-6         | 45.7E-6          | 45.7E-6          | 45.7E-6          | 45.7E-6         | 45.7E-6         | 45.7E-6          | 45.7E-6         | 45.7E-6          | 45.7E-6          | 45.7E-6         | 45.7E-6         | 45.7E-6   |         |
| 18.78                                     | 9.28             | 49.41            | 18.03           | 1.41            | 2.30            | 12.72            | 4.39            | -873.1E-3        | 1.07             | 6.32             | 3.42            | -1.2E+0         | -2.2E+0          | 1.29            | 11.26            | 0.85             | 23.60           | 12.62           | 7.71      |         |
| 4.09                                      | 0.88             | 4.98             | 2.88            | 4.82            | 3.24            | 5.61             | 1.68            | 1.00             | 19.32            | 2.25             | 0.56            | 6.23            | 3.10             | 3.20            | 0.91             | 2.47             | 3.45            | 1.62            | 5.86      |         |
| >                                         | >                | >                | >               | >               | >               | >                | >               | >                | >                | >                | >               | >               | >                | >               | >                | >                | >               | >               | >         | >       |
| 42.3E-6                                   | 45.7E-6          | 45.7E-6          | 45.1E-6         | 45.3E-6         | 45.7E-6         | 45.7E-6          | 45.7E-6         | 45.7E-6          | 45.7E-6          | 45.7E-6          | 45.7E-6         | 45.7E-6         | 45.7E-6          | 45.7E-6         | 45.7E-6          | 45.7E-6          | 45.7E-6         | 45.7E-6         | 45.7E-6   | 45.7E-6 |
| 26.43                                     | 9.40             | 47.53            | 20.62           | 6.95            | 17.92           | 23.71            | 11.35           | 13.63            | 16.19            | 31.20            | 15.36           | 23.66           | 22.47            | 14.14           | 29.74            | 14.46            | 34.96           | 30.68           | 24.32     |         |
| 4.96                                      | 2.35             | 6.53             | 3.26            | 1.94            | 2.96            | 2.48             | 4.67            | 2.97             | 8.79             | 3.88             | 3.25            | 6.35            | 9.24             | 5.75            | 5.09             | 2.74             | 5.62            | 3.37            | 2.68      |         |
| >                                         | >                | >                | >               | >               | >               | >                | >               | >                | >                | >                | >               | >               | >                | >               | >                | >                | >               | >               | >         | >       |
| 42.3E-6                                   | 45.7E-6          | 45.7E-6          | 45.1E-6         | 45.3E-6         | 45.7E-6         | 45.7E-6          | 45.7E-6         | 45.7E-6          | 45.7E-6          | 45.7E-6          | 45.7E-6         | 45.7E-6         | 45.7E-6          | 45.7E-6         | 45.7E-6          | 45.7E-6          | 45.7E-6         | 45.7E-6         | 45.7E-6   | 45.7E-6 |
| 19.84                                     | 6.21             | 45.10            | 17.38           | 3.36            | 15.91           | 17.73            | 5.76            | 9.84             | 15.20            | 33.15            | 11.59           | 16.54           | 12.85            | 10.98           | 18.11            | 9.60             | 33.41           | 19.46           | 16.60     |         |
| 1.86                                      | 4.33             | 2.99             | 1.74            | 3.19            | 2.76            | 5.85             | 2.73            | 1.68             | 6.65             | 6.33             | 1.25            | 3.13            | 6.03             | 9.34            | 8.79             | 7.54             | 3.33            | 7.26            | 1.96      |         |

| SF-0100023482-1                                                                   | SF-01000289290-1                                                                  | SF-01000254817-1                                                                  | SF-01000295053-1                                                                  | SF-01000106641-1                                                                  | SF-01000271350-1                                                                  | SF-01000099440-1                                                                  | SF-01000115944-1                                                                  | SF-01000348203-1                                                                  | SF-01000296731-1                                                                  | SF-0100032489-1                                                                   | SF-01000135766-1                                                                  | SF-0100031787-1                                                                   | SF-01000199901-1                                                                   | SF-01000333351-1                                                                    | SF-0100044287-1                                                                     | SF-01000106201-1                                                                    | SF-01000285703-1                                                                    | SF-01000235880-1                                                                    | SF-01000324800-1                                                                    |               |
|-----------------------------------------------------------------------------------|-----------------------------------------------------------------------------------|-----------------------------------------------------------------------------------|-----------------------------------------------------------------------------------|-----------------------------------------------------------------------------------|-----------------------------------------------------------------------------------|-----------------------------------------------------------------------------------|-----------------------------------------------------------------------------------|-----------------------------------------------------------------------------------|-----------------------------------------------------------------------------------|-----------------------------------------------------------------------------------|-----------------------------------------------------------------------------------|-----------------------------------------------------------------------------------|------------------------------------------------------------------------------------|-------------------------------------------------------------------------------------|-------------------------------------------------------------------------------------|-------------------------------------------------------------------------------------|-------------------------------------------------------------------------------------|-------------------------------------------------------------------------------------|-------------------------------------------------------------------------------------|---------------|
|  |  |  |  |  |  |  |  |  |  |  |  |  |  |  |  |  |  |  |  |               |
| ChemBridge                                                                        | ChemBridge                                                                        | ChemBridge                                                                        | ChemDiv                                                                           | ChemDiv                                                                           | ChemBridge                                                                        | ChemDiv                                                                           | ChemDiv                                                                           | ChemDiv                                                                           | ChemBridge                                                                        | ChemDiv                                                                           | ChemDiv                                                                           | ChemDiv                                                                           | ChemBridge                                                                         | ChemBridge                                                                          | ChemBridge                                                                          | ChemDiv                                                                             | ChemDiv                                                                             | ChemBridge                                                                          | ChemBridge                                                                          |               |
| 6475864                                                                           | 7935659                                                                           | 7314826                                                                           | 7959388                                                                           | 0991-0004                                                                         | 7722941                                                                           | C756-0152                                                                         | 7706-0015                                                                         | ASN 06577716                                                                      | 6167610                                                                           | BAS 09668359                                                                      | C753-1930                                                                         | ASN 08245352                                                                      | 5231551                                                                            | AEM 10396833                                                                        | K784-7981                                                                           | C753-1665                                                                           | 7916720                                                                             | 6495558                                                                             | BAS 11099827                                                                        |               |
| 26                                                                                | 30                                                                                | 29                                                                                | 29                                                                                | 24                                                                                | 21                                                                                | 28                                                                                | 24                                                                                | 29                                                                                | 27                                                                                | 19                                                                                | 31                                                                                | 22                                                                                | 27                                                                                 | 29                                                                                  | 25                                                                                  | 30                                                                                  | 26                                                                                  | 26                                                                                  | 22                                                                                  |               |
| 1                                                                                 | 1                                                                                 | 3                                                                                 | 2                                                                                 | 1                                                                                 | 2                                                                                 | 1                                                                                 | 1                                                                                 | 1                                                                                 | 1                                                                                 | 2                                                                                 | 2                                                                                 | 1                                                                                 | 2                                                                                  | 1                                                                                   | 1                                                                                   | 2                                                                                   | 1                                                                                   | 1                                                                                   | 2                                                                                   |               |
| 4                                                                                 | 3                                                                                 | 4                                                                                 | 3                                                                                 | 4                                                                                 | 3                                                                                 | 3                                                                                 | 4                                                                                 | 5                                                                                 | 3                                                                                 | 6                                                                                 | 3                                                                                 | 6                                                                                 | 6                                                                                  | 5                                                                                   | 3                                                                                   | 3                                                                                   | 4                                                                                   | 4                                                                                   | 3                                                                                   |               |
| 437.73                                                                            | 443.32                                                                            | 416.53                                                                            | 397.55                                                                            | 357.42                                                                            | 326.22                                                                            | 398.56                                                                            | 319.40                                                                            | 420.82                                                                            | 402.89                                                                            | 264.37                                                                            | 410.51                                                                            | 302.33                                                                            | 398.91                                                                             | 410.53                                                                              | 336.43                                                                              | 408.51                                                                              | 417.26                                                                              | 441.34                                                                              | 313.78                                                                              |               |
| 3.14                                                                              | 3.95                                                                              | 4.10                                                                              | 2.74                                                                              | 3.76                                                                              | 3.62                                                                              | 3.27                                                                              | 1.95                                                                              | 3.08                                                                              | 3.59                                                                              | 2.76                                                                              | 3.40                                                                              | 0.75                                                                              | 3.80                                                                               | 3.19                                                                                | 3.28                                                                                | 2.31                                                                                | 2.96                                                                                | 3.64                                                                                | 3.49                                                                                |               |
| 3.14                                                                              | 3.95                                                                              | 1.29                                                                              | 2.72                                                                              | 3.69                                                                              | 1.94                                                                              | 3.27                                                                              | 1.74                                                                              | 3.08                                                                              | 3.59                                                                              | 2.20                                                                              | 3.40                                                                              | 0.75                                                                              | 3.80                                                                               | 3.19                                                                                | 3.47                                                                                | 3.28                                                                                | 2.31                                                                                | 2.96                                                                                | 3.49                                                                                |               |
| indol_3yl_alk(461)                                                                 | indol_3yl_alk(461)                                                                  | indol_3yl_alk(461)                                                                  | indol_3yl_alk(461)                                                                  | indol_3yl_alk(461)                                                                  | indol_3yl_alk(461)                                                                  | indol_3yl_alk(461)                                                                  | manmch_A(296) |
| > 45.7E-6                                                                          | > 45.7E-6                                                                           | > 45.7E-6                                                                           | > 45.7E-6                                                                           | > 45.7E-6                                                                           | > 45.7E-6                                                                           | > 45.7E-6                                                                           | > 45.7E-6     |
| 10.94                                                                             | 19.63                                                                             | -5.3E+0                                                                           | 7.52                                                                              | 20.48                                                                             | -3.9E+0                                                                           | -6.2E+0                                                                           | 45.74                                                                             | -9.8E+0                                                                           | 10.20                                                                             | 17.49                                                                             | 3.90                                                                              | -6.9E+0                                                                           | 25.39                                                                              | 0.14                                                                                | 0.12                                                                                | 21.21                                                                               | 4.85                                                                                | 1.69                                                                                | 10.94                                                                               |               |
| 12.51                                                                             | 17.66                                                                             | 5.63                                                                              | 17.44                                                                             | 13.42                                                                             | 13.64                                                                             | 9.31                                                                              | 48.00                                                                             | 13.69                                                                             | 5.75                                                                              | 17.17                                                                             | 19.07                                                                             | 11.41                                                                             | 8.80                                                                               | 19.19                                                                               | 9.49                                                                                | 17.19                                                                               | 8.69                                                                                | 4.59                                                                                | 12.51                                                                               |               |
| 0.28                                                                              | 0.20                                                                              | 0.21                                                                              | 0.21                                                                              | 0.25                                                                              | 0.29                                                                              | 0.22                                                                              | 0.25                                                                              | 0.21                                                                              | 0.23                                                                              | 0.32                                                                              | 0.20                                                                              | 0.28                                                                              | 0.23                                                                               | 0.21                                                                                | 0.24                                                                                | 0.20                                                                                | 0.23                                                                                | 0.23                                                                                | 0.28                                                                                |               |
| ###                                                                               | ###                                                                               | ###                                                                               | ###                                                                               | ###                                                                               | ###                                                                               | ###                                                                               | ###                                                                               | ###                                                                               | ###                                                                               | ###                                                                               | ###                                                                               | ###                                                                               | ###                                                                                | ###                                                                                 | ###                                                                                 | ###                                                                                 | ###                                                                                 | ###                                                                                 | ###                                                                                 | ###           |
| 0.85                                                                              | 0.39                                                                              | 3.05                                                                              | 1.62                                                                              | 0.65                                                                              | 2.40                                                                              | 1.07                                                                              | 2.60                                                                              | 1.26                                                                              | 0.75                                                                              | 2.14                                                                              | 0.95                                                                              | 3.59                                                                              | 0.54                                                                               | 1.15                                                                                | 0.87                                                                                | 1.06                                                                                | 2.03                                                                                | 1.38                                                                                | 0.85                                                                                |               |
| > 45.7E-6                                                                          | > 45.7E-6                                                                           | > 45.7E-6                                                                           | > 45.7E-6                                                                           | > 45.7E-6                                                                           | > 45.7E-6                                                                           | > 45.7E-6                                                                           | > 45.7E-6     |
| 7.66                                                                              | 1.13                                                                              | 4.62                                                                              | 0.25                                                                              | 8.31                                                                              | -1.1E+0                                                                           | 1.14                                                                              | 16.98                                                                             | 6.68                                                                              | 4.97                                                                              | 34.36                                                                             | 5.36                                                                              | 27.95                                                                             | 2.77                                                                               | 3.82                                                                                | 9.70                                                                                | 11.12                                                                               | 0.06                                                                                | 2.86                                                                                | 7.66                                                                                |               |
| 7.92                                                                              | 1.13                                                                              | 3.28                                                                              | 3.88                                                                              | 2.37                                                                              | 4.32                                                                              | 3.72                                                                              | 1.73                                                                              | 3.18                                                                              | 1.97                                                                              | 10.37                                                                             | 6.02                                                                              | 11.08                                                                             | 2.17                                                                               | 1.96                                                                                | 7.75                                                                                | 2.11                                                                                | 2.02                                                                                | 2.64                                                                                | 7.92                                                                                |               |
| > 45.7E-6                                                                          | > 45.7E-6                                                                           | > 45.7E-6                                                                           | > 45.7E-6                                                                           | > 45.7E-6                                                                           | > 45.7E-6                                                                           | > 45.7E-6                                                                           | > 45.7E-6     |
| 6.89                                                                              | 11.04                                                                             | 25.99                                                                             | 5.60                                                                              | 13.91                                                                             | 19.06                                                                             | 17.17                                                                             | 18.42                                                                             | 13.65                                                                             | 30.90                                                                             | 28.05                                                                             | 22.31                                                                             | 12.46                                                                             | 15.54                                                                              | 20.64                                                                               | 29.45                                                                               | 19.12                                                                               | 15.37                                                                               | 20.95                                                                               | 6.89                                                                                |               |
| 1.48                                                                              | 3.07                                                                              | 4.64                                                                              | 4.68                                                                              | 3.71                                                                              | 15.04                                                                             | 8.00                                                                              | 3.21                                                                              | 3.69                                                                              | 3.24                                                                              | 4.29                                                                              | 1.42                                                                              | 0.35                                                                              | 2.28                                                                               | 3.19                                                                                | 3.51                                                                                | 3.51                                                                                | 2.64                                                                                | 16.04                                                                               | 1.48                                                                                |               |
| > 45.7E-6                                                                          | > 45.7E-6                                                                           | > 45.7E-6                                                                           | > 45.7E-6                                                                           | > 45.7E-6                                                                           | > 45.7E-6                                                                           | > 45.7E-6                                                                           | > 45.7E-6     |
| 10.46                                                                             | 11.04                                                                             | 20.81                                                                             | 4.28                                                                              | 12.75                                                                             | 8.20                                                                              | 13.37                                                                             | 11.15                                                                             | 6.40                                                                              | 22.40                                                                             | 25.75                                                                             | 16.88                                                                             | 5.07                                                                              | 12.33                                                                              | 13.06                                                                               | 24.24                                                                               | 22.75                                                                               | 12.32                                                                               | 20.06                                                                               | 10.46                                                                               |               |
| 0.60                                                                              | 1.06                                                                              | 1.06                                                                              | 4.17                                                                              | 0.85                                                                              | 19.65                                                                             | 6.37                                                                              | 6.48                                                                              | 3.49                                                                              | 2.16                                                                              | 5.40                                                                              | 1.95                                                                              | 3.16                                                                              | 5.87                                                                               | 3.51                                                                                | 3.06                                                                                | 5.95                                                                                | 0.75                                                                                | 12.87                                                                               | 0.60                                                                                |               |

| SR               | Chemical Structure | Source       | PubChem ID   | Count | Score | Score | Score  | Score | Score | Score | Score     | Score     | Score | Score | Score | Score | Score     | Score     |       |           |       |      |           |       |       |
|------------------|--------------------|--------------|--------------|-------|-------|-------|--------|-------|-------|-------|-----------|-----------|-------|-------|-------|-------|-----------|-----------|-------|-----------|-------|------|-----------|-------|-------|
| SF-0100028569-1  |                    | ChemBridge   | 6990311      | 21    | 1     | 3     | 311.44 | 3.77  | 3.77  |       | > 45.7E-6 | -4.3E+0   | 4.49  | 0.29  | ###   | 0.57  | > 45.7E-6 | 4.52      | 3.34  | > 45.7E-6 | 23.35 | 2.34 | > 45.7E-6 | 18.81 | 0.46  |
| SF-01000348318-1 |                    | Asinex       | ASN 07274721 | 25    | 1     | 4     | 338.45 | 3.78  | 3.78  |       | > 45.7E-6 | -15.5E+0  | 11.25 | 0.24  | ###   | 0.56  | > 45.7E-6 | 3.26      | 2.05  | > 45.7E-6 | 14.88 | 2.48 | > 45.7E-6 | 12.92 | 4.69  |
| SF-01000317422-1 |                    | Asinex       | BAS 00127549 | 22    | 0     | 2     | 290.36 | 4.49  | 4.49  |       | > 45.7E-6 | 6.52      | 6.18  | 0.28  | ###   | ##### | > 45.7E-6 | 15.84     | 1.12  | > 45.7E-6 | 36.70 | 3.57 | > 45.7E-6 | 31.10 | 6.07  |
| SF-0100027206-1  |                    | ChemBridge   | 7749545      | 25    | 1     | 5     | 334.41 | 4.94  | 4.94  |       | > 45.7E-6 | 11.90     | 9.09  | 0.24  | ###   | ##### | > 45.7E-6 | 9.57      | 2.44  | > 45.7E-6 | 23.54 | 4.49 | > 45.7E-6 | 20.81 | 1.84  |
| SF-01000353698-1 |                    | Asinex       | AST 06571411 | 28    | 1     | 5     | 396.87 | 4.43  | 4.43  |       | > 45.7E-6 | 2.60      | 8.03  | 0.22  | ###   | ##### | > 45.7E-6 | 4.81      | 3.88  | > 45.7E-6 | 25.79 | 4.01 | > 45.7E-6 | 11.63 | 8.01  |
| SF-01000287779-1 |                    | ChemBridge   | 7928910      | 25    | 1     | 3     | 433.27 | 3.05  | 3.05  |       | > 45.7E-6 | 24.90     | 17.84 | 0.24  | ###   | 1.29  | > 45.7E-6 | 32.13     | 5.14  | > 45.7E-6 | 32.23 | 6.03 | > 45.7E-6 | 27.90 | 3.37  |
| SF-01000212925-1 |                    | ChemDiv      | C527-0741    | 28    | 1     | 3     | 402.55 | 3.34  | 3.32  |       | > 45.7E-6 | 6.08      | 16.85 | 0.22  | ###   | 1.02  | > 45.7E-6 | 3.00      | 3.01  | > 45.7E-6 | 19.44 | 0.39 | > 45.7E-6 | 16.88 | 1.18  |
| SF-01000106178-1 |                    | ChemDiv      | C753-1629    | 29    | 2     | 3     | 390.52 | 3.36  | 3.36  |       | > 45.7E-6 | 14.49     | 16.33 | 0.21  | ###   | 0.98  | > 45.7E-6 | 3.70      | 4.81  | > 45.7E-6 | 25.34 | 3.22 | > 45.7E-6 | 20.89 | 4.82  |
| SF-01000004532   |                    | SigmaAldrich | T2320        | 31    | 1     | 3     | 481.33 | 4.77  | 4.49  |       | > 45.7E-6 | 4.32      | 10.57 | 0.20  | ###   | ##### | > 45.7E-6 | 5.79      | 4.12  | > 45.7E-6 | 15.67 | 5.44 | > 45.7E-6 | 11.52 | 3.44  |
| SF-01000289313-1 |                    | ChemBridge   | 6224766      | 24    | 1     | 3     | 431.73 | 3.37  | 3.37  |       | > 45.7E-6 | 23.71     | 26.37 | 0.25  | ###   | 0.97  | > 45.7E-6 | 0.41      | 1.79  | > 45.7E-6 | 20.40 | 5.73 | > 45.7E-6 | 11.08 | 2.56  |
| SF-01000258231-1 |                    | ChemBridge   | 6074033      | 25    | 0     | 5     | 412.25 | 3.17  | 3.17  |       | > 45.7E-6 | 9.37      | 17.98 | 0.24  | ###   | 1.17  | > 45.7E-6 | 3.36      | 2.93  | > 45.7E-6 | 7.57  | 1.54 | > 45.7E-6 | 3.91  | 0.87  |
| SF-01000226450-1 |                    | ChemBridge   | 6058084      | 24    | 4     | 6     | 326.39 | 4.68  | 4.25  |       | > 45.7E-6 | -974.1E-3 | 13.97 | 0.25  | ###   | 0.09  | > 45.7E-6 | 2.75      | 2.46  | > 45.7E-6 | 24.54 | 3.72 | > 45.7E-6 | 22.23 | 1.80  |
| SF-01000001375   |                    | MicroSource  | 01503934     | 27    | 1     | 5     | 403.97 | 3.69  | 2.82  |       | > 45.7E-6 | 10.17     | 16.66 | 0.23  | ###   | 1.52  | > 45.7E-6 | -2.8E+0   | 3.85  | > 45.7E-6 | 23.28 | 3.64 | > 45.7E-6 | 20.61 | 1.61  |
| SF-01000233672-1 |                    | ChemBridge   | 6400918      | 24    | 0     | 3     | 360.90 | 3.99  | 3.99  |       | > 45.7E-6 | -2.9E+0   | 8.27  | 0.25  | ###   | 0.35  | > 45.7E-6 | 0.13      | 1.77  | > 45.7E-6 | 20.00 | 7.08 | > 45.7E-6 | 13.93 | 7.58  |
| SF-0100026096-1  |                    | ChemBridge   | 7377356      | 24    | 0     | 3     | 330.46 | 3.96  | 3.96  |       | > 45.7E-6 | -4.1E+0   | 5.62  | 0.25  | ###   | 0.38  | > 45.7E-6 | -416.8E-3 | 4.00  | > 45.7E-6 | 23.17 | 5.05 | > 45.7E-6 | 17.76 | 9.67  |
| SF-01000153722-1 |                    | ChemDiv      | D014-0048    | 23    | 1     | 4     | 314.42 | 1.99  | 1.74  |       | > 45.7E-6 | 3.60      | 5.25  | 0.26  | ###   | 2.60  | > 45.7E-6 | 13.01     | 2.39  | > 45.7E-6 | 18.46 | 7.31 | > 45.7E-6 | 11.04 | 10.39 |
| SF-0100018322-1  |                    | Asinex       | BAS 03386064 | 26    | 1     | 4     | 370.37 | 4.22  | 4.20  |       | > 45.7E-6 | 11.82     | 6.33  | 0.23  | ###   | 0.14  | > 45.7E-6 | 10.03     | 2.07  | > 45.7E-6 | 33.63 | 6.23 | > 45.7E-6 | 29.33 | 5.16  |
| SF-01000113297-1 |                    | ChemDiv      | 6018-0225    | 24    | 1     | 7     | 330.34 | 2.61  | 2.61  |       | > 45.7E-6 | 16.60     | 16.40 | 0.25  | ###   | 1.73  | > 45.7E-6 | 2.21      | 5.77  | > 45.7E-6 | 3.60  | 2.01 | > 45.7E-6 | 3.46  | 1.55  |
| SF-01000233335-1 |                    | ChemBridge   | 6469056      | 31    | 1     | 5     | 448.58 | 3.81  | 3.81  |       | > 45.7E-6 | -1.6E+0   | 12.42 | 0.20  | ###   | 0.53  | > 45.7E-6 | 2.62      | 3.45  | > 45.7E-6 | 11.30 | 3.67 | > 45.7E-6 | 8.60  | 6.02  |
| SF-0100028569-1  |                    | ChemBridge   | 7937271      | 28    | 1     | 5     | 416.37 | 1.98  | 1.98  |       | > 45.7E-6 | 36.05     | 13.89 | 0.22  | ###   | 2.36  | > 45.7E-6 | 14.08     | 13.77 | > 45.7E-6 | 28.15 | 3.21 | > 45.7E-6 | 15.65 | 15.38 |

indol\_3yl\_alk(461)

mannich\_A(296)



| SR-0100004522-1 | SR-01000024217-1 | SR-01000017424-1 | SR-01000015792-1 | SR-01000006671-1 | SR-01000047932-1 | SR-01000265381 | SR-0100026533-1 | SR-01000401381 | SR-0100024762-1 | SR-0100088054-1 | SR-01000253940-1 | SR-0100025817-1 | SR-0100028155-1 | SR-01000910344-1 | SR-0100032617-1 | SR-01000139653-1 | SR-01000925275-1 | SR-01000323393-1 |         |         |
|-----------------|------------------|------------------|------------------|------------------|------------------|----------------|-----------------|----------------|-----------------|-----------------|------------------|-----------------|-----------------|------------------|-----------------|------------------|------------------|------------------|---------|---------|
|                 |                  |                  |                  |                  |                  |                |                 |                |                 |                 |                  |                 |                 |                  |                 |                  |                  |                  |         |         |
| Eramine         | Life Chemicals   | Life Chemicals   | Life Chemicals   | Life Chemicals   | ChemDiv          | ChemBridge     | ChemBridge      | ChemBridge     | ChemBridge      | ChemDiv         | ChemBridge       | ChemBridge      | ChemBridge      | Life Chemicals   | Asinex          | ChemDiv          | Life Chemicals   | Asinex           |         |         |
| T0518-5204      | F2597-0101       | F1854-0019       | F2031-0666       | F0526-1308       | 7790-1092        | 7960672        | 6061526         | 7567236        | ASN 05551942    | 5786784         | 7188000          | 7184581         | 7914038         | F5041-0268       | BAS 09668346    | E002-0538        | F5832-0261       | BAS 00782554     |         |         |
| 30              | 27               | 28               | 23               | 31               | 22               | 23             | 26              | 21             | 27              | 27              | 25               | 27              | 26              | 24               | 20              | 27               | 26               | 24               |         |         |
| 0               | 1                | 4                | 5                | 2                | 3                | 2              | 3               | 1              | 0               | 6               | 1                | 0               | 3               | 6                | 1               | 2                | 1                | 3                |         |         |
| 7               | 4                | 3                | 3.54             | 4.90             | 3.20             | 3.82           | 3.72            | 3.40           | 3.65            | 2.37            | 3.56             | 3.77            | 4.10            | 1.02             | 3.27            | 5.05             | 3.73             | 1.42             |         |         |
| 1.70            | 3.64             | 3.67             | 3.54             | 4.64             | 2.45             | 3.80           | 3.70            | 3.40           | 3.65            | -0.40           | 3.56             | 3.77            | 4.09            | 1.02             | 2.79            | 5.05             | 3.73             | 1.20             |         |         |
| 429.45          | 410.46           | 392.47           | 314.36           | 435.54           | 314.36           | 329.42         | 347.41          | 395.19         | 386.92          | 371.43          | 380.89           | 364.40          | 375.85          | 345.42           | 276.38          | 399.43           | 377.47           | 321.29           |         |         |
| 1.70            | 3.66             | 3.68             | 3.54             | 4.90             | 3.20             | 3.82           | 3.72            | 3.40           | 3.65            | 2.37            | 3.56             | 3.77            | 4.09            | 1.02             | 3.27            | 5.05             | 3.73             | 1.42             |         |         |
| 1.20            | 1.20             | 1.20             | 1.20             | 1.20             | 1.20             | 1.20           | 1.20            | 1.20           | 1.20            | 1.20            | 1.20             | 1.20            | 1.20            | 1.20             | 1.20            | 1.20             | 1.20             | 1.20             | 1.20    |         |
| 4.79            | 4.79             | 4.79             | 4.79             | 4.79             | 4.79             | 4.79           | 4.79            | 4.79           | 4.79            | 4.79            | 4.79             | 4.79            | 4.79            | 4.79             | 4.79            | 4.79             | 4.79             | 4.79             | 4.79    |         |
|                 |                  |                  |                  |                  |                  |                |                 |                |                 |                 |                  |                 |                 |                  |                 |                  |                  |                  |         |         |
| >               | >                | >                | >                | >                | >                | >              | >               | >              | >               | >               | >                | >               | >               | >                | >               | >                | >                | >                | >       |         |
| 45.7E-6         | 45.7E-6          | 45.7E-6          | 45.7E-6          | 45.7E-6          | 45.7E-6          | 45.7E-6        | 45.7E-6         | 45.7E-6        | 45.7E-6         | 45.7E-6         | 45.7E-6          | 45.7E-6         | 45.7E-6         | 45.7E-6          | 45.7E-6         | 45.7E-6          | 45.7E-6          | 45.7E-6          | 45.7E-6 |         |
| 24.06           | -2.3E+0          | 15.82            | 15.09            | 18.62            | 28.67            | 15.09          | 34.86           | 0.01           | 15.82           | 7.22            | 4.29             | -16.1E+0        | 4.32            | -1.9E+0          | 22.83           | 1.95             | 11.53            | 13.45            | 0.25    |         |
| 13.45           | 11.53            | 10.31            | 15.09            | 15.25            | 13.63            | 15.09          | 34.17           | 16.19          | 10.31           | 11.99           | 12.01            | 6.09            | 18.85           | 15.08            | 14.92           | 16.28            | 11.53            | 13.45            | 0.25    |         |
| 0.25            | 0.26             | 0.22             | 0.26             | 0.20             | 0.28             | 0.26           | 0.23            | 0.29           | 0.23            | 0.23            | 0.24             | 0.23            | 0.23            | 0.25             | 0.30            | 0.23             | 0.23             | 0.25             | 0.25    |         |
| ###             | ###              | ###              | ###              | ###              | ###              | ###            | ###             | ###            | ###             | ###             | ###              | ###             | ###             | ###              | ###             | ###              | ###              | ###              | ###     | ###     |
| 3.14            | 0.79             | 0.66             | 0.79             | ###              | 1.89             | 0.54           | 0.64            | 0.94           | 0.69            | 4.74            | 0.78             | 0.57            | 0.25            | 3.32             | 1.55            | ###              | 0.61             | 3.14             | 3.14    |         |
| >               | >                | >                | >                | >                | >                | >              | >               | >              | >               | >               | >                | >               | >               | >                | >               | >                | >                | >                | >       | >       |
| 45.7E-6         | 46.5E-6          | 46.5E-6          | 46.5E-6          | 46.4E-6          | 45.7E-6          | 45.7E-6        | 45.7E-6         | 45.7E-6        | 45.7E-6         | 45.7E-6         | 45.7E-6          | 45.7E-6         | 45.7E-6         | 45.7E-6          | 45.7E-6         | 45.7E-6          | 45.7E-6          | 45.7E-6          | 45.7E-6 | 45.7E-6 |
| 17.47           | 3.21             | 7.13             | 3.21             | -2.2E+0          | 10.74            | 1.96           | 35.27           | -2.1E+0        | -1.6E+0         | 0.46            | 12.85            | 1.08            | 0.24            | 28.70            | 17.00           | 15.77            | 2.89             | 17.47            | 4.05    |         |
| 4.05            | 2.75             | 4.42             | 2.75             | 1.49             | 3.63             | 3.45           | 2.78            | 3.32           | 3.28            | 5.03            | 3.86             | 3.64            | 3.75            | 2.33             | 4.25            | 1.12             | 3.20             | 4.05             | 4.05    |         |
| >               | >                | >                | >                | >                | >                | >              | >               | >              | >               | >               | >                | >               | >               | >                | >               | >                | >                | >                | >       | >       |
| 45.7E-6         | 46.5E-6          | 46.5E-6          | 46.5E-6          | 46.4E-6          | 45.7E-6          | 45.7E-6        | 45.7E-6         | 45.7E-6        | 45.7E-6         | 45.7E-6         | 45.7E-6          | 45.7E-6         | 45.7E-6         | 45.7E-6          | 45.7E-6         | 45.7E-6          | 45.7E-6          | 45.7E-6          | 45.7E-6 | 45.7E-6 |
| 21.84           | 26.26            | 19.75            | 26.26            | 6.74             | 10.77            | 17.20          | 17.39           | 10.83          | 8.29            | 4.21            | 32.70            | 14.10           | 18.48           | 30.09            | 30.62           | 31.26            | 26.04            | 21.84            | 21.84   | 21.84   |
| 1.19            | 3.41             | 2.64             | 3.41             | 2.87             | 5.53             | 1.43           | 19.87           | 1.49           | 2.34            | 2.06            | 2.37             | 3.93            | 0.90            | 4.52             | 7.88            | 3.03             | 1.84             | 1.19             | 1.19    | 1.19    |
| >               | >                | >                | >                | >                | >                | >              | >               | >              | >               | >               | >                | >               | >               | >                | >               | >                | >                | >                | >       | >       |
| 45.7E-6         | 46.5E-6          | 46.5E-6          | 46.5E-6          | 46.4E-6          | 45.7E-6          | 45.7E-6        | 45.7E-6         | 45.7E-6        | 45.7E-6         | 45.7E-6         | 45.7E-6          | 45.7E-6         | 45.7E-6         | 45.7E-6          | 45.7E-6         | 45.7E-6          | 45.7E-6          | 45.7E-6          | 45.7E-6 | 45.7E-6 |
| 16.84           | 14.71            | 16.74            | 14.71            | 3.89             | 5.82             | 9.47           | 21.58           | 3.43           | 5.58            | 3.84            | 21.91            | 8.00            | 16.28           | 26.47            | 28.38           | 23.97            | 18.99            | 16.84            | 16.84   | 16.84   |
| 1.62            | 7.20             | 0.99             | 7.20             | 2.42             | 5.18             | 4.45           | 4.47            | 0.17           | 3.94            | 3.31            | 2.80             | 8.98            | 2.05            | 1.82             | 3.08            | 2.84             | 6.90             | 1.62             | 1.62    | 1.62    |

|                                                                                     |                                                                                    |                                                                                    |                                                                                     |                                                                                   |                                                                                   |                                                                                   |                                                                                   |                                                                                   |                                                                                   |                                                                                   |
|-------------------------------------------------------------------------------------|------------------------------------------------------------------------------------|------------------------------------------------------------------------------------|-------------------------------------------------------------------------------------|-----------------------------------------------------------------------------------|-----------------------------------------------------------------------------------|-----------------------------------------------------------------------------------|-----------------------------------------------------------------------------------|-----------------------------------------------------------------------------------|-----------------------------------------------------------------------------------|-----------------------------------------------------------------------------------|
| SR-01000526704-1                                                                    | SR-01000533315-1                                                                   | SR-01000394877-1                                                                   | SR-0100006628-1                                                                     | SR-0100026567-1                                                                   | SR-0100047931-1                                                                   | SR-0100068951-1                                                                   | SR-0100047241-1                                                                   | SR-01000479551-1                                                                  | SR-0100052656-1                                                                   | SR-0100050581-1                                                                   |
|  |  |   |    |  |  |  |  |  |  |  |
| Enamine                                                                             | Enamine                                                                            | Enamine                                                                            | Enamine                                                                             | Enamine                                                                           | Enamine                                                                           | Enamine                                                                           | Enamine                                                                           | Enamine                                                                           | Enamine                                                                           | Enamine                                                                           |
| TS316067                                                                            | 0828-0243                                                                          | 0806-2387                                                                          | 8009-9257                                                                           | 8009-9018                                                                         | 70520-4474                                                                        | TS362953                                                                          | 4161-1755                                                                         | 8009-9016                                                                         | TS316067                                                                          | TS316067                                                                          |
| 23                                                                                  | 20                                                                                 | 21                                                                                 | 18                                                                                  | 19                                                                                | 31                                                                                | 26                                                                                | 26                                                                                | 21                                                                                | 23                                                                                | 23                                                                                |
| 1                                                                                   | 1                                                                                  | 0                                                                                  | 1                                                                                   | 1                                                                                 | 2                                                                                 | 0                                                                                 | 2                                                                                 | 1                                                                                 | 1                                                                                 | 1                                                                                 |
| 2                                                                                   | 3                                                                                  | 2                                                                                  | 3                                                                                   | 3                                                                                 | 4                                                                                 | 3                                                                                 | 3                                                                                 | 3                                                                                 | 2                                                                                 | 2                                                                                 |
| 347.40                                                                              | 268.31                                                                             | 290.75                                                                             | 262.73                                                                              | 276.76                                                                            | 442.90                                                                            | 371.86                                                                            | 357.58                                                                            | 304.81                                                                            | 347.40                                                                            | 347.40                                                                            |
| 3.88                                                                                | 4.55                                                                               | 5.12                                                                               | 1.65                                                                                | 2.14                                                                              | 2.29                                                                              | 3.65                                                                              | 4.57                                                                              | 2.88                                                                              | 3.88                                                                              | 3.88                                                                              |
| 3.88                                                                                | 4.55                                                                               | 5.12                                                                               | 1.60                                                                                | 2.10                                                                              | 2.29                                                                              | 3.65                                                                              | 0.70                                                                              | 2.71                                                                              | 3.88                                                                              | 3.88                                                                              |
|    |   |  |  |  |  |  |  |  |  |  |
| > 47.3E-6                                                                           | > 51.2E-6                                                                          | > 51.8E-6                                                                          | > 52.3E-6                                                                           | > 49.7E-6                                                                         | > 49.5E-6                                                                         | > 49.1E-6                                                                         | > 47.8E-6                                                                         | > 47.5E-6                                                                         | > 47.3E-6                                                                         | > 47.3E-6                                                                         |
| 13.22                                                                               | -9.9E+0                                                                            | 3.45                                                                               | -1.6E+0                                                                             | 12.80                                                                             | 2.80                                                                              | -112.9E-3                                                                         | 8.55                                                                              | -10.2E+0                                                                          | 13.22                                                                             | 13.22                                                                             |
| 4.59                                                                                | 4.20                                                                               | 18.47                                                                              | 6.76                                                                                | 5.23                                                                              | 1.87                                                                              | 13.26                                                                             | 15.89                                                                             | 16.16                                                                             | 4.59                                                                              | 4.59                                                                              |
| 0.26                                                                                | 0.30                                                                               | 0.29                                                                               | 0.33                                                                                | 0.32                                                                              | 0.19                                                                              | 0.23                                                                              | 0.23                                                                              | 0.29                                                                              | 0.26                                                                              | 0.26                                                                              |
| ###                                                                                 | ####                                                                               | ####                                                                               | ###                                                                                 | ###                                                                               | ###                                                                               | ###                                                                               | ###                                                                               | ###                                                                               | ###                                                                               | ###                                                                               |
| 0.45                                                                                | ####                                                                               | ####                                                                               | 2.68                                                                                | 2.21                                                                              | 2.01                                                                              | 0.65                                                                              | 3.62                                                                              | 1.61                                                                              | 0.45                                                                              | 0.45                                                                              |
| > 47.3E-6                                                                           | > 51.2E-6                                                                          | > 51.8E-6                                                                          | > 52.3E-6                                                                           | > 49.7E-6                                                                         | > 49.5E-6                                                                         | > 49.1E-6                                                                         | > 47.8E-6                                                                         | > 47.5E-6                                                                         | > 47.3E-6                                                                         | > 47.3E-6                                                                         |
| 5.09                                                                                | -8.1E+0                                                                            | 23.33                                                                              | 23.74                                                                               | 19.93                                                                             | 14.06                                                                             | -448.1E-3                                                                         | 10.70                                                                             | 10.33                                                                             | 5.09                                                                              | 5.09                                                                              |
| 1.13                                                                                | 4.06                                                                               | 4.66                                                                               | 7.22                                                                                | 4.12                                                                              | 8.50                                                                              | 3.61                                                                              | 3.77                                                                              | 1.98                                                                              | 1.13                                                                              | 1.13                                                                              |
| > 47.3E-6                                                                           | > 51.2E-6                                                                          | > 51.8E-6                                                                          | > 52.3E-6                                                                           | > 49.7E-6                                                                         | > 49.5E-6                                                                         | > 49.1E-6                                                                         | > 47.8E-6                                                                         | > 47.5E-6                                                                         | > 47.3E-6                                                                         | > 47.3E-6                                                                         |
| 24.60                                                                               | 22.87                                                                              | 39.76                                                                              | 24.26                                                                               | 23.72                                                                             | 33.18                                                                             | 26.06                                                                             | 29.38                                                                             | 21.05                                                                             | 24.60                                                                             | 24.60                                                                             |
| 3.53                                                                                | 2.76                                                                               | 3.03                                                                               | 7.21                                                                                | 3.87                                                                              | 4.16                                                                              | 5.70                                                                              | 11.20                                                                             | 3.59                                                                              | 3.53                                                                              | 3.53                                                                              |
| > 47.3E-6                                                                           | > 51.2E-6                                                                          | > 51.8E-6                                                                          | > 52.3E-6                                                                           | > 49.7E-6                                                                         | > 49.5E-6                                                                         | > 49.1E-6                                                                         | > 47.8E-6                                                                         | > 47.5E-6                                                                         | > 47.3E-6                                                                         | > 47.3E-6                                                                         |
| 16.20                                                                               | 18.58                                                                              | 39.30                                                                              | 21.45                                                                               | 17.00                                                                             | 26.64                                                                             | 19.24                                                                             | 32.99                                                                             | 16.50                                                                             | 16.20                                                                             | 16.20                                                                             |
| 1.32                                                                                | 5.02                                                                               | 1.29                                                                               | 1.21                                                                                | 2.38                                                                              | 4.44                                                                              | 1.95                                                                              | 3.58                                                                              | 2.00                                                                              | 1.32                                                                              | 1.32                                                                              |
